# Supplementary material for: Where the river turns old: Urbanized deltas imprint a fossil signature on black carbon exported to the ocean
Source: Research Square preprint supplement (doi:10.21203/rs.3.rs-8021964/v1), 2025-11-19
Supplement: Supplementary file 1 [file 61c009fbf2074f9c7a0ff13c.pdf]

**Supporting Information**

**Where the river turns old: Urbanized deltas imprint a fossil signature on black carbon exported to the ocean**

Xin Yi<sup>1,2</sup>, Xiaofei Geng<sup>1,3</sup>, Guangcai Zhong<sup>1, \*</sup>, Bolong Zhang<sup>1</sup>, Sanyuan Zhu<sup>1</sup>, Hongxing Jiang<sup>1</sup>, Yangzhi Mo<sup>1</sup>, Shizhen Zhao<sup>1</sup>, Jun Li<sup>1</sup>, Huizheng Che<sup>2</sup>, Gan Zhang<sup>1,\*</sup>

<sup>1</sup> State Key Laboratory of Advanced Environmental Technology (SKLAET) and Guangdong-Hong Kong-Macao Joint Laboratory for Environmental Pollution and Control, Guangzhou Institute of Geochemistry, Chinese Academy of Sciences, Guangzhou, 510640, China

<sup>2</sup> State Key Laboratory of Severe Weather Meteorological Science and Technology (LaSW) & Key Laboratory of Atmospheric Chemistry of CMA, Chinese Academy of Meteorological Sciences, Beijing, 100081, China

<sup>3</sup> School of Marine Sciences, Hainan University, Haikou, 570228, China

\*Corresponding Author: Dr. Gan Zhang

Tel: +86-20-85290805; fax: +86-20-85290706; e-mail: zhanggan@gig.ac.cn

\*Corresponding Author: Dr. Guangcai Zhong

Tel: +86-20-38350480; fax: +86-20- 38350480; e-mail: gczhong@gig.ac.cn

**Content: 22 pages, 6 texts, 7 tables, and 2 figures**

**List of Contents:**

**Supplementary Texts**

**Text S1.** SPE-DOC extraction and carbon content measurements

**Text S2.** Stable carbon ( $\delta^{13}\text{C}$ ) and radiocarbon ( $\delta^{14}\text{C}$ ) analysis of SPE-DOC and POC

**Text S3.** Parameter calculations for FT-ICR-MS

**Text S4.** Concentration measurements of DBC and PBC

**Text S5.** Preparative high-performance liquid chromatography (prep-HPLC)

**Text S6.** Stable carbon isotope analysis ( $\delta^{13}\text{C}$ ) of DBC and PBC

**Supplementary Tables**

**Table S1.** Information on eight sampling sites during the first sampling campaign. The commercial, industrial, and residential areas, as well as the road length, are data within 5 km of each sampling site.

**Table S2.** Binary gradient of HPLC method for BPCA quantification.

**Table S3.** Binary gradient of preparative high-performance liquid chromatography (prep-HPLC).

**Table S4.** Concentrations of DOC and POC, and  $\delta^{13}\text{C}$ - $\Delta^{14}\text{C}$  of SPE-DOC and POC along the urbanization gradient of the Liuxi River.

**Table S5.** BPCAs Concentrations of DBC along the urbanization gradient of the Liuxi River.

**Table S6.** BPCAs Concentrations of PBC along the urbanization gradient of the Liuxi River.

43 **Table S7.** Dual-carbon isotopic compositions ( $\Delta^{14}\text{C}$ - $\delta^{13}\text{C}$ ) of DBC and PBC at the  
44 upper reach (forest site) and lower reach (urban site).

45 **Supplementary Figures**

46 **Figure S1.** Monthly precipitation during the second sampling campaign (May 2021 to  
47 April 2022) of Guangzhou.

48 **Figure S2.** DOM molecular compositions along the urbanization gradient of the Liuxi  
49 River.

50 **References**

51

## Supplementary Texts

### Text S1. SPE-DOC extraction and carbon content measurements

DOC was isolated from water samples using solid phase extraction (SPE).<sup>1</sup> Briefly, prepacked SPE cartridges (Varian Bond Elut PPL cartridges, Agilent, the US) were conditioned with methanol and HCl (pH = 2). Filtered and acidified water samples were siphoned through the SPE cartridge with a cleaned PTFE (polytetrafluoroethylene) tube at a slow loading rate ( $<20 \text{ mL min}^{-1}$ ). This flow rate was monitored and maintained throughout the sample loading. After extraction, the cartridge sorbent was rinsed with two bed-volume of HCl (pH = 2) to remove salts, then the PPL cartridge was freeze-dried. Isolated DOC was eluted from the SPE cartridge with two bed-volume methanol. The methanol eluent was then condensed to  $\sim 5 \text{ mL}$  via a rotary evaporator.

To determine the carbon content of SPE-DOC, an aliquot of the methanol eluent was transferred to a 20-mL glass bottle and dried under a stream of high-purity nitrogen gas at  $40^\circ \text{C}$ . The residue was redissolved in  $10 \text{ mL}$  ultrapure water ( $18.2 \text{ M}\Omega \text{ cm}^{-1}$ , Sartorius), and the carbon content was quantified following the same method as DOC.

**Text S2. Stable carbon ( $\delta^{13}\text{C}$ ) and radiocarbon ( $\delta^{14}\text{C}$ ) analysis of SPE-DOC and POC**

The  $\delta^{13}\text{C}$  of SPE-DOC and POC were determined by elemental analysis-isotope ratio mass spectrometry (EA-IRMS). The methanol eluent containing 20–40  $\mu\text{g C}$  SPE-DOC was weighed into tin boats and evaporated to dryness in an oven at 60 °C. Then the tin boats were folded and combusted using a Thermo Scientific Flash Elemental Analyser interfaced with a Thermo Scientific Delta V Plus IRMS. A two-point calibration was performed to calculate the  $\delta^{13}\text{C}$  values using two international reference standards (USGS40,  $\delta^{13}\text{C} = -26.39 \pm 0.04\text{‰}$ ; IAEA-CH-6,  $\delta^{13}\text{C} = -10.45 \pm 0.04\text{‰}$ )<sup>2</sup>. A working standard (Casein standard OAS, CatNo. B2155-Batch no. 2821,  $\delta^{13}\text{C} = -26.98 \pm 0.13\text{‰}$ , Elemental Microanalysis Ltd) was used for routine quality assurance. For POC analysis, the GF/F filters containing particulate material were treated with concentrated HCl (36%) vapor in a desiccator for at least 24 h to completely remove carbonates. After freeze-drying, organic matters were scraped off the filters, transferred into tin boats, and analyzed by EA-IRMS.

In similar procedures to  $\delta^{13}\text{C}$  analysis, the SPE-DOC and POC samples were packed into the tin boats and combusted at 900 °C for 2.5 h to oxidize into  $\text{CO}_2$ , which was then reduced to graphite using hydrogen at 525 °C for 3 h over iron catalysts.<sup>3</sup> The graphite was pressed into aluminum targets for  $\Delta^{14}\text{C}$  measurement with AMS at the Guangzhou Institute of Geochemistry, Chinese Academy of Sciences.<sup>4</sup>

### Text S3. Parameter calculations for FT-ICR-MS

The modified aromatic index ( $AI_{mod}$ ) is calculated using the equation:<sup>5,6</sup>

$$AI_{mod} = (1 + c - 0.5o - s - 0.5h) / (c - 0.5o - s - n)$$

In order to consider the intensity of each formula and its contribution to the overall property, the intensity-weighted  $AI_{mod}$  ( $AI_{mod-w}$ ) and elemental ratio ( $H/C_{-w}$  and  $O/C_{-w}$ ) were calculated based on the following equations.<sup>7,8</sup>

$$AI_{mod-w} = \sum (In_i \times AI_{mod\ i}) / \sum In_i$$

$$H/C_{-w} = \sum (In_i \times H/C_i) / \sum In_i$$

$$O/C_{-w} = \sum (In_i \times O/C_i) / \sum In_i$$

Where  $AI_{mod\ i}$ ,  $H/C_i$ , and  $O/C_i$  represent the  $AI_{mod}$ ,  $H/C$ , and  $O/C$  of the individual molecular formula (i), respectively,  $In_i$  is the intensity for individual molecular formula (i), and i is the total number of identified molecular formulas in a given sample.

#### **Text S4. Concentration measurements of DBC and PBC**

Both DBC and PBC were determined using the BPCA method following our previous studies.<sup>9-11</sup> Briefly, SPE-DOC extracts (~500 mL water sample equivalents) were transferred into a 10 mL ampoule and dried at 40 °C under high-purity nitrogen blowing. Concentrated nitric acid (2 mL, 65%, p.a., Sigma Aldrich) was added to each ampule, then the ampoules were flame-sealed and heated to 180 °C for 8 h. After oxidation, the solutions were dried under high-purity nitrogen at 50 °C. The BPCA-containing residue was re-dissolved in ultrapure water and filtered with a syringe filter (13 mm × 0.22 µm, PTFE, ANPEL Laboratory Technologies) for further analysis.

For PBC analysis, the GF/F filters containing particulate material were treated with concentrated HCl (36%) vapor in a desiccator for at least 24 h to completely remove carbonates. After freeze-drying, organic matters were scraped off the filters and transferred into a 10 mL ampoule. Concentrated nitric acid (2 mL) was added to each ampule. The ampoules were flame-sealed and heated to 180 °C for 8 h. After oxidation, the sample solutions were dried under a stream of high-purity nitrogen gas at 50 °C. The dried samples were re-dissolved in ultrapure water and passed through a glass column packed with cation exchange resin (Dowex 50 WX8 400, Sigma Aldrich) to remove extensive metal ions.<sup>12-14</sup> The eluate was freeze-dried and re-dissolved in ultrapure water, followed by filtration with a syringe filter (13 mm × 0.22 µm, PTFE, ANPEL Laboratory Technologies) for further analysis.

BPCAs were separated on an Agilent InfinityLab Poroshell 120 SB-C18 (4.6 × 100 mm, 2.7 µm, the US) column and quantified by a high-performance liquid

chromatography system equipped with a photodiode array detector (HPLC-PAD, Shimadzu, Japan). Mobile phase A was an aqueous solution prepared by mixing 20 mL of phosphoric acid (85%; Sigma-Aldrich) in 980 mL ultrapure water. HPLC-grade acetonitrile (Sigma-Aldrich) was used as mobile phase B. The mixing gradients of mobile phases A and B are shown in Table S2. The flow rate and column oven temperature were 0.4 mL min/L and 30 °C, respectively. Peak identifications of BPCAs in samples were based on the retention times and absorbance spectra (190–400 nm). The intensities of BPCA peaks at a wavelength of 240 nm were used for quantification.

Seven BPCAs were quantified, including 1,2,3,4,5,6-benzenhexacarboxylic acid (B6CA), 1,2,3,4,5-benzenepentacarboxylic acid (B5CA), 1,2,4,5-benzenetetracarboxylic acid, 1,2,3,5-benzenetetracarboxylic acid, 1,2,3,4-benzenetetracarboxylic acid (B4CAs), 1,2,3-benzenetricarboxylic acid, and 1,2,4-benzenetricarboxylic acid (B3CAs). A conversion factor of 5.7 from BPCAs-C to PBC was used to calculate PBC concentrations based on our previous study.<sup>9, 15, 16</sup> DBC concentrations were calculated using the established relationship between DBC and BPCAs shown below.<sup>17</sup>

$$[\text{PBC}] = 5.7 \times ([\text{B6CA}] + [\text{B5CA}] + [\text{B4CAs}] + [\text{B3CAs}])$$

$$[\text{DBC}] = 33.4 \times ([\text{B6CA}] + [\text{B5CA}] + 0.5 \times [\text{B4CAs}] + 0.5 \times [\text{B3CAs}])$$

The units of PBC(DBC) and BPCA are  $\mu\text{M-C}$  and  $\mu\text{M}$ , respectively. It is worth noting that there are no two commercially available standards for 1,2,3,5-B4CA and 1,2,3,4-B4CA, these two B4CAs were quantified using the calibration curve of their isomer (i.e., 1,2,4,5-B4CA).



## **Text S5. Preparative high-performance liquid chromatography (prep-HPLC)**

In a procedure similar to the concentration measurement, DBC and PBC samples were oxidized with concentrated nitric acid. After drying the oxidized solutions, the samples were re-dissolved in ultrapure water and passed through a cation exchange column (Dowex 50 WX8 400). The eluate was freeze-dried and re-dissolved in 0.38% TFA (mobile phase A of prep-HPLC), followed by filtration with a syringe filter (13 mm  $\times$  0.22  $\mu$ m, PTFE). BPCAs were separated with an Agilent Poroshell 120 SB-C18 (4.6  $\times$  150 mm, 2.7  $\mu$ m, the US) column and collected by a preparative liquid chromatography using an HPLC system equipped with a photodiode array detector (prep-HPLC-PAD, LC-20AT/SPD-M20A, Shimadzu). Mobile phase A was prepared by mixing 3.8 mL trifluoroacetic acid (TFA) in 1 L ultrapure water (pH~1.3), acetonitrile was used as mobile phase B. The mixing gradients of mobile phases A and B are shown in [Table S3](#). It took a total run time of 62.10 min. Flow rate and column oven temperature were 0.4 mL min<sup>-1</sup> and 30 °C. Individual BPCA was collected in a separate glass tube via a fraction collector (FRC-10A, Shimadzu). The collected fractions were put into 25-mL glass flasks and concentrated to ~1 mL using a rotary evaporator. They were then transferred to 1.5 mL glass vials and dried under high-purity nitrogen (99.999%) gas at 70 °C for 1 h. B4CA isomers were pooled together for subsequent isotopic analysis. B3CAs were not collected due to their low abundance.

**Text S6. Stable carbon isotope analysis ( $\delta^{13}\text{C}$ ) of DBC and PBC**

The  $\delta^{13}\text{C}$  measurements of BPCAs were performed on an UltiMate 3000 HPLC system connected to a Delta V Plus IRMS via an Isolink interface (HPLC-IRMS, Thermo Scientific). Before  $\delta^{13}\text{C}$  analysis, the isolated BPCA was redissolved in 0.5 mL of ultrapure water and sonicated for 5 min to ensure complete dissolution. The HPLC-IRMS setup was as follows: Ultrapure water was used as the mobile phase at a flow rate of 200  $\mu\text{L}/\text{min}$ . Online oxidation quantitatively converted individual BPCA to  $\text{CO}_2$  in the Isolink oxidation chamber (98  $^\circ\text{C}$ ) by adding  $\text{H}_3\text{PO}_4$  and oxidant ( $\text{Na}_2\text{S}_2\text{O}_8$ ). The flow rates of acid and oxidant were optimized to yield an  $\text{O}_2$  signal ( $m/z = 32$ ) of 8–12 V to ensure full oxidation capacity. The derived  $\text{CO}_2$  was then extracted from the mobile phase and dried prior to detection by IRMS.

The HPLC-IRMS system did not require an LC column because of the preliminary isolation of individual BPCA, which took only 6.5 min for each measurement run. A two-point calibration was performed to calculate the BPCA- $\delta^{13}\text{C}$  values with two international reference standards (USGS40,  $\delta^{13}\text{C} = -26.39 \pm 0.04\text{‰}$ ; IAEA-CH-6,  $\delta^{13}\text{C} = -10.45 \pm 0.04\text{‰}$ ). BPCA standards were analyzed daily before sample analysis to assess the stability of HPLC-IRMS.

185    **Supplementary Tables**

186    **Table S1. Concentrations of DOC and POC, and  $\delta^{13}\text{C}$ - $\Delta^{14}\text{C}$  of SPE-DOC and POC along the urbanization gradient of the Liuxi River.**

| Sample ID | Dissolved Phase         |                      |                                                   |                      |                                                   |                        | Particulate Phase       |                      |                                               |                      |                                               |                        |
|-----------|-------------------------|----------------------|---------------------------------------------------|----------------------|---------------------------------------------------|------------------------|-------------------------|----------------------|-----------------------------------------------|----------------------|-----------------------------------------------|------------------------|
|           | DOC ( $\mu\text{M-C}$ ) |                      | $\delta^{13}\text{C}_{\text{SPE-DOC}} (\text{‰})$ |                      | $\Delta^{14}\text{C}_{\text{SPE-DOC}} (\text{‰})$ |                        | POC ( $\mu\text{M-C}$ ) |                      | $\delta^{13}\text{C}_{\text{POC}} (\text{‰})$ |                      | $\Delta^{14}\text{C}_{\text{POC}} (\text{‰})$ |                        |
|           | Wet season              | Dry season           | Wet season                                        | Dry season           | Wet season                                        | Dry season             | Wet season              | Dry season           | Wet season                                    | Dry season           | Wet season                                    | Dry season             |
| 1         | 50.60                   | 44.17                | -28.60                                            | -29.05               | -62.82                                            | -90.98                 | 77.33                   | 16.62                | -27.79                                        | -28.59               | -77.40                                        | -236.25                |
| 2         | 52.77                   | 45.56                | -28.41                                            | -28.87               | -78.43                                            | -114.76                | 40.44                   | 12.34                | -29.16                                        | -27.04               | -84.54                                        | -218.85                |
| 3         | 64.97                   | 51.38                | -28.42                                            | -28.77               | -73.66                                            | -94.72                 | 441.39                  | 36.80                | -27.38                                        | -27.07               | -54.23                                        | -144.09                |
| 4         | 76.42                   | 56.67                | -28.36                                            | -28.27               | -80.00                                            | -124.34                | 166.63                  | 62.17                | -29.15                                        | -27.06               | -53.91                                        | -198.39                |
| 5         | 88.06                   | 65.56                | -28.14                                            | -28.07               | -110.14                                           | -122.83                | 137.56                  | 175.85               | -32.16                                        | -26.89               | -64.50                                        | -164.83                |
| 6         | 111.11                  | 68.61                | -27.48                                            | -28.06               | -139.10                                           | -159.49                | 192.88                  | 28.54                | -24.94                                        | -27.84               | -67.49                                        | -200.85                |
| 7         | 123.06                  | 88.33                | -27.63                                            | -27.85               | -167.00                                           | -186.42                | 272.58                  | 35.55                | -30.74                                        | -28.12               | -86.74                                        | -246.64                |
| 8         | 154.17                  | 122.50               | -27.20                                            | -27.38               | -177.78                                           | -205.77                | 255.69                  | 138.65               | -29.86                                        | -27.55               | -156.89                                       | -274.13                |
| Average   | 90.14<br>$\pm 36.66$    | 67.85<br>$\pm 26.37$ | -28.03<br>$\pm 0.52$                              | -28.29<br>$\pm 0.57$ | -111.12<br>$\pm 44.92$                            | -137.41<br>$\pm 42.15$ | 198.06<br>$\pm 126.59$  | 63.32<br>$\pm 60.71$ | -28.90<br>$\pm 2.21$                          | -27.52<br>$\pm 0.61$ | -80.71<br>$\pm 33.22$                         | -210.51<br>$\pm 42.80$ |

188    **Table S2. BPCAs Concentrations of DBC along the urbanization gradient of the Liuxi River.**

| Sample ID                              | Wet season      |                 |                 |                 |                 | Dry season      |                 |                 |                 |                 |
|----------------------------------------|-----------------|-----------------|-----------------|-----------------|-----------------|-----------------|-----------------|-----------------|-----------------|-----------------|
| From upper reaches<br>to lower reaches | B3CAs<br>(µg/L) | B4CAs<br>(µg/L) | B5CAs<br>(µg/L) | B6CAs<br>(µg/L) | DBC<br>(µmol/L) | B3CAs<br>(µg/L) | B4CAs<br>(µg/L) | B5CAs<br>(µg/L) | B6CAs<br>(µg/L) | DBC<br>(µmol/L) |
| 1                                      | 0.37            | 3.34            | 2.83            | 0.92            | 1.45            | 0.34            | 2.59            | 2.26            | 0.79            | 1.17            |
| 2                                      | 0.43            | 3.68            | 3.03            | 0.97            | 1.57            | 0.45            | 3.15            | 2.74            | 0.92            | 1.42            |
| 3                                      | 0.52            | 4.72            | 4.34            | 1.25            | 2.13            | 0.38            | 3.17            | 3.83            | 0.99            | 1.70            |
| 4                                      | 0.66            | 6.04            | 4.85            | 1.38            | 2.49            | 0.59            | 4.71            | 4.41            | 1.37            | 2.18            |
| 5                                      | 0.99            | 9.21            | 7.19            | 2.00            | 3.72            | 0.66            | 5.07            | 5.43            | 1.70            | 2.58            |
| 6                                      | 1.13            | 9.92            | 7.95            | 2.08            | 4.05            | 0.62            | 4.92            | 4.00            | 1.29            | 2.09            |
| 7                                      | 1.49            | 13.18           | 9.33            | 2.58            | 5.02            | 0.74            | 5.74            | 4.59            | 1.55            | 2.43            |
| 8                                      | 2.09            | 17.57           | 12.22           | 3.63            | 6.70            | 1.11            | 10.00           | 7.65            | 2.20            | 4.01            |
| Average                                | 0.96 ± 0.60     | 8.46 ± 5.03     | 6.47 ± 3.30     | 1.85 ± 0.93     | 3.39 ± 1.84     | 0.61 ± 0.25     | 4.92 ± 2.33     | 4.36 ± 1.67     | 1.35 ± 0.46     | 2.20 ± 0.88     |

190     **Table S3. BPCAs Concentrations of PBC along the urbanization gradient of the Liuxi River.**

| Sample ID<br><br>From upper reaches<br>to lower reaches | Wet season      |                 |                 |                 |                 | Dry season      |                 |                 |                 |                 |
|---------------------------------------------------------|-----------------|-----------------|-----------------|-----------------|-----------------|-----------------|-----------------|-----------------|-----------------|-----------------|
|                                                         | B3CAs<br>(µg/L) | B4CAs<br>(µg/L) | B5CAs<br>(µg/L) | B6CAs<br>(µg/L) | PBC<br>(µmol/L) | B3CAs<br>(µg/L) | B4CAs<br>(µg/L) | B5CAs<br>(µg/L) | B6CAs<br>(µg/L) | PBC<br>(µmol/L) |
| 1                                                       | 0.57            | 6.19            | 7.41            | 8.47            | 10.75           | 0.07            | 0.73            | 0.78            | 0.92            | 1.18            |
| 2                                                       | 0.19            | 1.65            | 2.11            | 2.26            | 2.94            | 0.05            | 0.48            | 0.56            | 0.81            | 0.90            |
| 3                                                       | 2.70            | 24.00           | 26.85           | 25.87           | 37.72           | 0.15            | 1.94            | 2.83            | 2.08            | 3.32            |
| 4                                                       | 0.80            | 3.55            | 3.39            | 3.09            | 5.15            | 0.19            | 2.80            | 3.60            | 3.37            | 4.73            |
| 5                                                       | 0.76            | 1.89            | 1.67            | 1.54            | 2.78            | 0.78            | 10.98           | 11.79           | 13.27           | 17.49           |
| 6                                                       | 0.74            | 1.29            | 0.94            | 0.97            | 1.87            | 0.10            | 1.20            | 1.50            | 1.53            | 2.05            |
| 7                                                       | 1.11            | 1.71            | 1.21            | 1.27            | 2.51            | 0.13            | 1.60            | 1.80            | 2.03            | 2.64            |
| 8                                                       | 1.63            | 10.66           | 8.58            | 9.84            | 14.58           | 0.79            | 11.94           | 10.32           | 16.05           | 18.58           |
| Average                                                 | 1.06 ± 0.78     | 6.37 ± 7.81     | 6.52 ± 8.71     | 6.66 ± 8.47     | 9.79 ± 12.17    | 0.28 ± 0.31     | 3.96 ± 4.69     | 4.15 ± 4.40     | 5.01 ± 6.06     | 6.36 ± 7.31     |

192     **Table S4. Dual-carbon isotopic compositions ( $\Delta^{14}\text{C}$ - $\delta^{13}\text{C}$ ) and  $^{14}\text{C}$  ages of DBC and PBC at the forest and urban sites.**

| Compounds                    |                                              | DBC                            |                                |                                |                                |                                |                                | PBC                            |                                |                                |                                |                                |                                |
|------------------------------|----------------------------------------------|--------------------------------|--------------------------------|--------------------------------|--------------------------------|--------------------------------|--------------------------------|--------------------------------|--------------------------------|--------------------------------|--------------------------------|--------------------------------|--------------------------------|
|                              |                                              | Wet Season                     |                                | Dry Season                     |                                | Mix Season                     |                                | Wet Season                     |                                | Dry Season                     |                                | Mix Season                     |                                |
|                              |                                              | Forest site                    | Urban site                     |
| $\delta^{13}\text{C}$<br>(‰) | B6CA                                         | -29.26<br>± 0.39               | -27.56<br>± 0.40               | -29.41<br>± 0.39               | -27.31<br>± 0.40               | -29.47<br>± 0.42               | -27.96<br>± 0.39               | -25.73<br>± 0.39               | -21.02<br>± 0.39               | -29.12<br>± 0.45               | -24.70<br>± 0.39               | -24.95<br>± 0.39               | -22.67<br>± 0.41               |
|                              | B5CA                                         | -29.33<br>± 0.22               | -27.72<br>± 0.24               | -27.11<br>± 0.23               | -27.43<br>± 0.27               | -28.52<br>± 0.23               | -27.72<br>± 0.22               | -25.80<br>± 0.22               | -21.93<br>± 0.23               | -26.14<br>± 0.23               | -22.36<br>± 0.23               | -24.84<br>± 0.22               | -23.20<br>± 0.22               |
|                              | B4CAs                                        | -28.51<br>± 0.18               | -27.50<br>± 0.21               | -28.91<br>± 0.18               | -27.47<br>± 0.23               | -29.07<br>± 0.18               | -27.73<br>± 0.18               | -27.70<br>± 0.19               | -23.46<br>± 0.18               | -30.45<br>± 0.18               | -25.12<br>± 0.19               | -26.05<br>± 0.18               | -25.70<br>± 0.18               |
|                              | $\delta^{13}\text{C}_{\text{BC}}^{\text{a}}$ | <b>-28.92</b><br><b>± 0.49</b> | <b>-27.60</b><br><b>± 0.52</b> | <b>-28.26</b><br><b>± 0.49</b> | <b>-27.44</b><br><b>± 0.53</b> | <b>-28.90</b><br><b>± 0.51</b> | <b>-27.75</b><br><b>± 0.49</b> | <b>-26.36</b><br><b>± 0.49</b> | <b>-22.16</b><br><b>± 0.49</b> | <b>-28.59</b><br><b>± 0.54</b> | <b>-24.23</b><br><b>± 0.49</b> | <b>-25.24</b><br><b>± 0.49</b> | <b>-24.04</b><br><b>± 0.50</b> |
| $\Delta^{14}\text{C}$<br>(‰) | B6CA                                         | -2.0<br>± 14.8                 | -182.9<br>± 6.9                | -12.3<br>± 21.2                | -220.7<br>± 8.2                | -5.1<br>± 15.2                 | -152.7<br>± 8.4                | -172.8<br>± 17.6               | -362.5<br>± 13.2               | -345.6<br>± 52.8               | -599.3<br>± 11.8               | -98.6<br>± 17.3                | -354.9<br>± 35.9               |
|                              | B5CA                                         | -36.0<br>± 12.1                | -134.5<br>± 3.6                | -4.9<br>± 16.7                 | -163.0<br>± 4.1                | -2.6<br>± 11.2                 | -121.8<br>± 3.4                | -44.8<br>± 29.1                | -187.1<br>± 34.7               | n.d.                           | -294.3<br>± 96.3               | 3.5<br>± 51.5                  | -190.7<br>± 143.4              |
|                              | B4CAs                                        | -65.7<br>± 12.0                | -282.8<br>± 2.7                | -71.7<br>± 14.5                | -312.2<br>± 2.8                | -38.9<br>± 11.0                | -239.9<br>± 3.1                | -177.8<br>± 55.1               | -320.5<br>± 36.1               | -145.5<br>± 126.8              | -392.3<br>± 63.2               | -66.1<br>± 48.4                | -329.8<br>± 119.6              |
|                              | $\Delta^{14}\text{C}_{\text{BC}}^{\text{a}}$ | <b>-46.7</b><br><b>± 7.8</b>   | <b>-210.9</b><br><b>± 2.1</b>  | <b>-39.3</b><br><b>± 10.1</b>  | <b>-245.8</b><br><b>± 2.3</b>  | <b>-20.2</b><br><b>± 7.2</b>   | <b>-182.7</b><br><b>± 2.2</b>  | <b>-134.5</b><br><b>± 20.4</b> | <b>-290.4</b><br><b>± 17.5</b> | <b>-245.5</b><br><b>± 68.7</b> | <b>-418.3</b><br><b>± 39.9</b> | <b>-54.5</b><br><b>± 23.5</b>  | <b>-292.1</b><br><b>± 67.0</b> |
| $^{14}\text{C}$ ages         |                                              | <b>386 ± 71</b>                | <b>1934 ± 22</b>               | <b>328 ± 87</b>                | <b>2300 ± 25</b>               | <b>166 ± 65</b>                | <b>1641 ± 24</b>               | <b>1177 ± 197</b>              | <b>2796 ± 196</b>              | <b>2334 ± 683</b>              | <b>5211 ± 543</b>              | <b>467 ± 198</b>               | <b>2811 ± 745</b>              |

193     <sup>a</sup>  $\delta^{13}\text{C}_{\text{BC}}$  and  $\Delta^{14}\text{C}_{\text{BC}}$  were calculated based on mass balance using the abundances and  $\delta^{13}\text{C}$  and  $\Delta^{14}\text{C}$  values of individual BPCAs.

194     n.d.: No  $\Delta^{14}\text{C}$  data was reported for dry-season PBC because the B5CA yield was insufficient for reliable  $\Delta^{14}\text{C}$  measurement.

195     **Table S5. Information on eight sampling sites during the first sampling campaign.**

| <b>Sample ID</b>            | <b>Longitude (°E)</b> | <b>Latitude (°N)</b> |
|-----------------------------|-----------------------|----------------------|
| From upstream to downstream |                       |                      |
| 1                           | 113.72                | 23.72                |
| 2                           | 113.66                | 23.66                |
| 3                           | 113.60                | 23.55                |
| 4                           | 113.52                | 23.49                |
| 5                           | 113.44                | 23.42                |
| 6                           | 113.35                | 23.41                |
| 7                           | 113.30                | 23.34                |
| 8                           | 113.20                | 23.25                |

196

197 **Table S6. Binary gradient of HPLC method for BPCA quantification.** (Mobile  
198 phase A: 2% H<sub>3</sub>PO<sub>4</sub> in ultrapure water; Mobile phase B: 100% acetonitrile. Flow rate  
199 = 0.4 mL/min)

| Time (min) | Mobile phase B (vol %) |
|------------|------------------------|
| 0          | 0.5                    |
| 5          | 0.5                    |
| 25.9       | 30                     |
| 26         | 95                     |
| 28         | 95                     |
| 28.1       | 0.5                    |
| 30         | 0.5                    |
| 50.5       | 0.5                    |

200



**Table S7. Binary gradient of preparative high-performance liquid chromatography (prep-HPLC).** (Mobile phase A: 0.38% TFA in ultrapure water; Mobile phase B: 100% acetonitrile. Flow rate = 0.4 mL/min)

| Time (min) | Mobile phase B (vol %) |
|------------|------------------------|
| 0          | 0.5                    |
| 5          | 0.5                    |
| 18         | 20                     |
| 37.9       | 30                     |
| 38         | 95                     |
| 40         | 95                     |
| 40.1       | 0.5                    |
| 62.01      | 0.5                    |

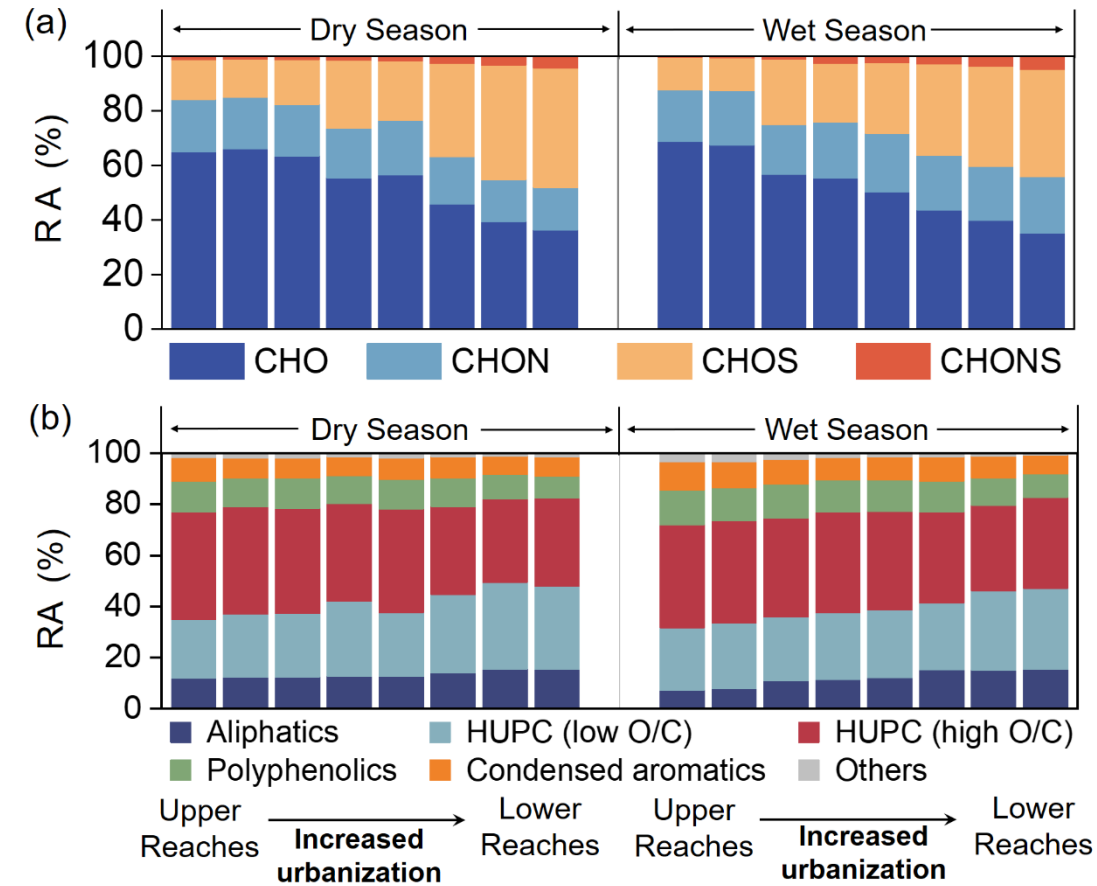

**Figure S1.** DOM molecular compositions along the urbanization gradient of the Liuxi River. (a) The relative abundance (RA) of CHO-, CHON-, CHOS- and CHONS-containing formulae. (b) The relative abundance (RA) of four groups of compounds, including aliphatic compounds, highly unsaturated and phenolic compounds (HUPs) (low oxygen), HUPs (high oxygen), polyphenolic compounds, and condensed aromatic compounds.

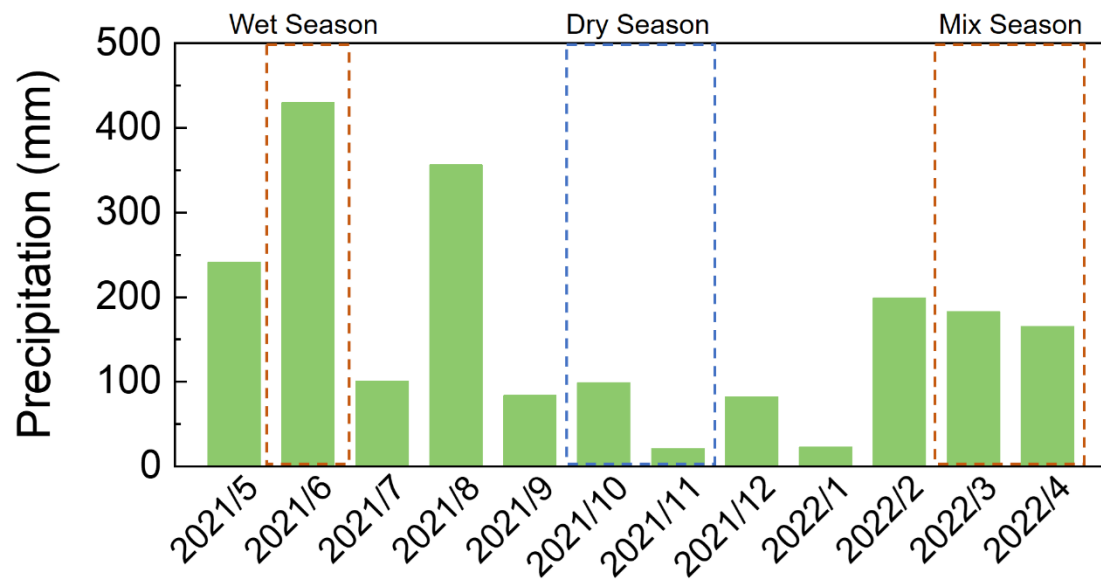

**Figure S2.** Monthly precipitation during the second sampling campaign (May 2021 to April 2022) of Guangzhou (Baiyun International Station, 23.39°N, 113.30°E). The data were obtained from <https://www.ncei.noaa.gov/maps/daily/>.

## 219    **References**

- 220    (1) Dittmar, T.; Koch, B.; Hertkorn, N.; Kattner, G. A simple and efficient method for  
 221    the solid-phase extraction of dissolved organic matter (SPE-DOM) from seawater.  
 222    *Limnol. Oceanogr.: Methods* **2008**, 6, 230-235. DOI: 10.4319/lom.2008.6.230.
- 223    (2) Meier-Augenstein, W.; Schimmelmann, A. A guide for proper utilisation of stable  
 224    isotope reference materials\*. *Isot. Environ. Health Stud.* **2019**, 55 (2), 113 - 128.
- 225    (3) Santos, G. M.; Southon, J. R.; Druffel-Rodriguez, K. C.; Griffin, S.; Mazon, M.  
 226    Magnesium perchlorate as an alternative water trap in AMS graphite sample preparation:  
 227    A report on sample preparation at KCCAMS at the University of California, Irvine.  
 228    *Radiocarbon* **2004**, 46 (1), 165-173. DOI: 10.1017/s0033822200039485.
- 229    (4) Zhu, S.; Ding, P.; Wang, N.; Shen, C.; Jia, G.; Zhang, G. The compact AMS facility  
 230    at Guangzhou Institute of Geochemistry, Chinese Academy of Sciences. *Nucl Instrum*  
 231    *Meth B* **2015**, 361, 72-75. DOI: 10.1016/j.nimb.2015.06.040.
- 232    (5) Koch, B. P.; Dittmar, T. From mass to structure: an aromaticity index for high-  
 233    resolution mass data of natural organic matter. *Rapid Commun. Mass Spectrom.* **2006**,  
 234    20 (5), 926-932, Article. DOI: 10.1002/rcm.2386.
- 235    (6) Koch, B. P.; Dittmar, T. From mass to structure: an aromaticity index for high-  
 236    resolution mass data of natural organic matter. *Rapid Commun. Mass Spectrom.* **2016**,  
 237    30 (1), 250-250. DOI: <https://doi.org/10.1002/rcm.7433>.
- 238    (7) Jiang, H.; Tang, J.; Li, J.; Zhao, S.; Mo, Y.; Tian, C.; Zhang, X.; Jiang, B.; Liao, Y.;  
 239    Chen, Y.; et al. Molecular Signatures and Sources of Fluorescent Components in  
 240    Atmospheric Organic Matter in South China. *Environ. Sci. Technol. Lett.* **2022**, 9 (11),  
 241    913-920. DOI: 10.1021/acs.estlett.2c00629.
- 242    (8) Mo, Y.; Li, J.; Zhong, G.; Zhu, S.; Cheng, Z.; Tang, J.; Jiang, H.; Jiang, B.; Liao, Y.;  
 243    Song, J.; et al. The Sources and Atmospheric Processes of Strong Light-Absorbing  
 244    Components in Water Soluble Brown Carbon: Insights From a Multi-Proxy Study of  
 245    PM<sub>2.5</sub> in 10 Chinese Cities. *J. Geophys. Res.: Atmos.* **2024**, 129 (2), e2023JD039512.  
 246    DOI: <https://doi.org/10.1029/2023JD039512>.
- 247    (9) Sun, Y.; Tang, J.; Mo, Y.; Geng, X.; Zhong, G.; Yi, X.; Yan, C.; Li, J.; Zhang, G.  
 248    Polycyclic Aromatic Carbon: A Key Fraction Determining the Light Absorption

249 Properties of Methanol-Soluble Brown Carbon of Open Biomass Burning Aerosols.  
 250 *Environ. Sci. Technol.* **2021**, 55 (23), 15724-15733. DOI: 10.1021/acs.est.1c06460.

251 (10) Geng, X.; Zhong, G.; Liu, J.; Sun, Y.; Yi, X.; Bong, C. W.; Zakaria, M. P.;  
 252 Gustafsson, Ö.; Ouyang, Y.; Zhang, G. Year-Round Measurements of Dissolved Black  
 253 Carbon in Coastal Southeast Asia Aerosols: Rethinking Its Atmospheric Deposition in  
 254 the Ocean. *J. Geophys. Res.: Atmos.* **2021**, 126 (18), e2021JD034590. DOI:  
 255 10.1029/2021JD034590.

256 (11) Vaezzadeh, V.; Yi, X.; Thomes, M. W.; Bong, C. W.; Lee, C. W.; Zakaria, M. P.;  
 257 Wang, A.-J.; Roslin, P. N. B.; Zhong, G.; Zhang, G. Use of molecular markers and  
 258 compound-specific isotopic signatures to trace sources of black carbon in surface  
 259 sediments of Peninsular Malaysia: Impacts of anthropogenic activities. *Mar. Chem.*  
 260 **2021**, 237, 104032. DOI: 10.1016/j.marchem.2021.104032.

261 (12) Hanke, U. M.; Wacker, L.; Haghipour, N.; Schmidt, M. W. I.; Eglinton, T. I.;  
 262 McIntyre, C. P. Comprehensive radiocarbon analysis of benzene polycarboxylic acids  
 263 (BPCAs) derived from pyrogenic carbon in environmental samples. *Radiocarbon* **2017**,  
 264 59 (4), 1103-1116. DOI: 10.1017/rdc.2017.44.

265 (13) Yi, X.; Zhong, G.; Geng, X.; Tang, J.; Lin, B.; Zhu, S.; Gao, S.; Yao, C.; Cheng,  
 266 Z.; Zhao, S.; et al. Dual-carbon isotope analysis of benzene polycarboxylic acids for  
 267 tracking black carbon across different environments. *Appl. Geochem.* **2024**, 170,  
 268 106062. DOI: <https://doi.org/10.1016/j.apgeochem.2024.106062>.

269 (14) Wiedemeier, D. B.; Lang, S. Q.; Gierga, M.; Abiven, S.; Bernasconi, S. M.; Fruh-  
 270 Green, G. L.; Hajdas, I.; Hanke, U. M.; Hilf, M. D.; McIntyre, C. P.; et al.  
 271 Characterization, Quantification and Compound-specific Isotopic Analysis of  
 272 Pyrogenic Carbon Using Benzene Polycarboxylic Acids (BPCA). *Jove-Journal of*  
 273 *Visualized Experiments* **2016**, (111), e53922. DOI: 10.3791/53922.

274 (15) Zhong, G.; Sun, Y.; Geng, X.; Yi, X.; Zhang, G. Benzene polycarboxylic acid  
 275 characterisation of polyaromatics in ambient aerosol: Method development. *Atmos.*  
 276 *Environ.* **2019**, 211, 55-62. DOI: 10.1016/j.atmosenv.2019.04.057.

277 (16) Vaezzadeh, V.; Yi, X.; Rais, F. R.; Bong, C. W.; Thomes, M. W.; Lee, C. W.; Zakaria,  
 278 M. P.; Wang, A. J.; Zhong, G.; Zhang, G. Distribution of black carbon and PAHs in  
 279 sediments of Peninsular Malaysia. *Mar. Pollut. Bull.* **2021**, 172. DOI:  
 280 10.1016/j.marpolbul.2021.112871.

281 (17) Dittmar, T. The molecular level determination of black carbon in marine dissolved  
282 organic matter. *Org. Geochem.* **2008**, 39 (4), 396-407. DOI:  
283 10.1016/j.orggeochem.2008.01.015.

284
